# Supplementary material
Source: PubMed Central journal article supplement (PMC5803558)
Supplement: NIHMS887232-supplement-supplemental_materials.pdf [file NIHMS887232-supplement-supplemental_materials.pdf]

## SUPPORTING INFORMATION

### **Data independent analysis of IgG glycoforms in samples of unfractionated human plasma.**

Miloslav Sanda <sup>a</sup>, Radoslav Goldman <sup>a,b,\*</sup>

<sup>a</sup> Department of Oncology, Lombardi Comprehensive Cancer Center, Georgetown University. Washington, D.C. 20057, <sup>b</sup> Department of Biochemistry and Molecular & Cellular Biology, Georgetown University, Washington, DC, 20057

\* Corresponding author. Tel: 202-687-9868, Fax: 202-687-1988, E-mail: [rg26@georgetown.edu](mailto:rg26@georgetown.edu)

## TABLE OF CONTENTS

|                                                                                                             |      |
|-------------------------------------------------------------------------------------------------------------|------|
| <b>Supplemental methods</b> .....                                                                           | S-3  |
| Study Population; DIA analysis of the glycoforms of IgG1 glycopeptides                                      |      |
| <b>Table T-1</b> .....                                                                                      | S-4  |
| Table of mass accuracy of the measurement of IgG glycoforms by DIA                                          |      |
| <b>Table T-2</b> .....                                                                                      | S-5  |
| Quantitative DIA analysis of the glycoforms of IgG1                                                         |      |
| <b>Table T-3</b> .....                                                                                      | S-6  |
| Reproducibility of the measurements of peak area of selected IgG glycoforms by DIA under optimized CE       |      |
| <b>Figure S-1</b> .....                                                                                     | S-7  |
| Optimization of the signal to noise (S/N) based on the isolation window (A) and based on the XIC method (B) |      |
| <b>Figure S-2</b> .....                                                                                     | S-8  |
| MS/MS spectra acquired under peptide based CE and ‘soft’ CE optimal for glycopeptides                       |      |
| <b>Figure S-3</b> .....                                                                                     | S-9  |
| Detection and fragmentation of IgG glycoforms using the DIA method                                          |      |
| <b>Figure S-4</b> .....                                                                                     | S-10 |
| Separation of G0F and G0F-N glycopeptides                                                                   |      |

## **Study Population**

Applicability of the method was documented on plasma samples of healthy controls (n=10) and patients with cirrhosis of the liver (n=10). All participants were recruited under protocols approved by the Georgetown University's Institutional Review Board in collaboration with the Department of Hepatology and Liver Transplantation, Georgetown University Hospital, Washington D.C. The healthy controls and cirrhotic patients were matched on age, race (60% Caucasian, 40% African-American), and gender (80% males). The samples of each study group were divided into two subsets (n=5 each) and were pooled for analysis by equal volume as described in detail previously 27.

## **DIA analysis of the glycoforms of IgG1 glycopeptides**

Plasma samples were diluted and prepared as described above. Samples were measured under optimized conditions using rolling CE ( $CE_{3+}=0.03 \cdot M-3$ ) and 5 Da SWATH window step. Tryptic digest of unfractionated plasma was separated using 90 mins gradient elution as follows: A 1 min trapping step using 2% ACN, 0.1% formic acid at 15  $\mu$ l/min was followed by chromatographic separation at 0.4  $\mu$ l/min as follows: starting conditions 1% ACN, 0.1% formic acid; 0-1 min 1-5% ACN, 1-60 min, 5-40% ACN, 0.1% formic acid; 60-65 min, 40-98% ACN, 0.1% formic acid; 65-70 min 98% ACN, 0.1% formic acid followed by equilibration to starting conditions for additional 20 minutes. Y-ion isotope cluster with isolation of a window of 1.2 Da, extracted from the SWATH MS/MS with a 5 Da step window, was used for analysis of the glycopeptide intensities (**Supplemental Table 2**).

| Formula | Structure                                                                           | IgG1 P01857               |       | IgG2/IgG3 P01859          |       | IgG4 P01861               |       |
|---------|-------------------------------------------------------------------------------------|---------------------------|-------|---------------------------|-------|---------------------------|-------|
|         |                                                                                     | EEQYN <sub>297</sub> STYR |       | EEQFN <sub>297</sub> STFR |       | EEQFN <sub>297</sub> STYR |       |
|         |                                                                                     | Product                   | delta | Product                   | delta | Product                   | delta |
|         |                                                                                     | [M+2H] <sup>2+</sup>      | ppm   | [M+2H] <sup>2+</sup>      | ppm   | [M+2H] <sup>2+</sup>      |       |
| G0      |    | 1142.958                  | 1.40  | 1126.963                  | 3.55  | 1134.960                  | 13.39 |
| G0N     |    | 1244.497                  | 4.82  | 1228.503                  | 0.98  | 1236.500                  | 12.13 |
| G0FN    |    | 1317.526                  | 2.35  | 1301.532                  | 0.31  | 1309.529                  | 1.68  |
| G0F     |    | 1215.987                  | 1.15  | 1199.992                  | 0.50  | 1207.989                  | 2.40  |
| G1      |    | 1142.958                  | 0.61  | 1126.963                  | 4.97  | 1134.960                  | 0.88  |
| G1N     |    | 1244.497                  | 0.96  | 1228.503                  | 2.93  | ND                        | NA    |
| G1FN    |    | 1317.526                  | 0.68  | 1301.532                  | 4.07  | 1309.529                  | 5.12  |
| G1FNS   |    | 1317.526                  | 3.49  | 1301.532                  | 2.46  | 1309.529                  | 0.61  |
| G1NS    |    | 1244.497                  | 4.82  | ND                        | NA    | ND                        | NA    |
| G1F     |    | 1215.987                  | 0.16  | 1199.992                  | 0.75  | 1207.989                  | 1.08  |
| G1FS    |    | 1215.987                  | 1.56  | 1199.992                  | 0.75  | 1207.989                  | 5.30  |
| G2      |    | 1223.984                  | 0.16  | 1207.989                  | 1.90  | 1215.987                  | 0.74  |
| G2N     |   | 1325.524                  | 12.30 | 1309.529                  | 4.81  | 1317.526                  | 0.08  |
| G2FN    |  | 1398.553                  | 1.64  | 1382.558                  | 0.65  | 1390.555                  | 0.36  |
| G2NS    |  | 1325.524                  | 2.04  | ND                        | NA    | ND                        | NA    |
| G2F     |  | 1297.013                  | 0.15  | 1281.018                  | 2.73  | 1289.016                  | 1.16  |
| G2FS    |  | 1297.013                  | 0.15  | 1281.018                  | 0.86  | 1289.016                  | 0.23  |
| G2S     |  | 1223.984                  | 4.74  | 1207.989                  | 6.95  | 1215.987                  | 1.81  |
| G2S2    |  | 1369.532                  | 6.94  | ND                        | NA    | ND                        | NA    |
| Man6    |  | 1392.591*                 | 11.78 | 1360.602*                 | 11.91 | ND                        | NA    |
| Man8    |  | 1392.591*                 | 1.36  | 1360.602*                 | 8.01  | 1376.597*                 | 14.60 |
| Man9    |  | 1392.591*                 | 0.22  | 1360.602*                 | 14.63 | 1376.597*                 | 5.09  |
| Man9Glc |  | 1392.591*                 | 0.07  | ND                        | NA    | ND                        | NA    |
| G0F-N   |  | 1114.447                  | 2.78  | 1098.452                  | 5.01  | 1106.449                  | 10.76 |
| G1F-N   |  | 1114.447                  | 4.04  | 1098.452                  | 6.83  | 1106.450                  | 9.58  |
| G1FS-N  |  | 1114.447                  | 13.82 | 1098.452                  | 3.10  | ND                        | NA    |

**Table T-1** Mass accuracy of Y-ion fragments of IgG glycoforms measured using independent analysis (DIA) and reported in Table 1.

| Formula | Ctrl Avg | Ctrl SD | Cirr Avg | Cirr SD | Cirr/Ctrl Ratio |
|---------|----------|---------|----------|---------|-----------------|
| G0      | 0.336    | 0.072   | 0.702    | 0.571   | 2.1             |
| G0F     | 4.600    | 0.375   | 14.023   | 5.257   | 3.1             |
| G0FN    | 6.026    | 0.198   | 17.251   | 0.798   | 2.9             |
| G0N     | 0.954    | 0.316   | 1.223    | 0.185   | 1.3             |
| G1      | 1.212    | 0.064   | 2.611    | 1.155   | 2.2             |
| G1F     | 9.260    | 0.034   | 15.149   | 6.486   | 1.6             |
| G1FN    | 3.616    | 0.269   | 6.874    | 0.260   | 1.9             |
| G1FNS   | 0.173    | 0.019   | 0.385    | 0.051   | 2.2             |
| G1FS    | 1.272    | 0.051   | 3.102    | 0.121   | 2.4             |
| G1N     | 0.356    | 0.072   | 0.471    | 0.056   | 1.3             |
| G2      | 0.872    | 0.185   | 0.832    | 0.198   | 1.0             |
| G0F-N   | 0.017    | 0.004   | 0.024    | 0.007   | 1.4             |
| G1F-N   | 0.088    | 0.009   | 0.190    | 0.074   | 2.2             |
| G1FS-N  | 0.152    | 0.031   | 0.266    | 0.008   | 1.8             |
| G2F     | 7.883    | 0.755   | 9.260    | 3.125   | 1.2             |
| G2FN    | 1.675    | 0.294   | 1.582    | 0.698   | 0.9             |
| G2FS    | 7.059    | 0.853   | 7.158    | 3.656   | 1.0             |
| G2N     | 0.654    | 0.005   | 1.248    | 0.038   | 1.9             |
| G2NS    | 0.141    | 0.018   | 0.174    | 0.004   | 1.2             |
| G2S     | 0.675    | 0.008   | 0.514    | 0.250   | 0.8             |
| Man 6   | 0.019    | 0.001   | 0.032    | 0.014   | 1.7             |
| Man 8   | 0.025    | 0.003   | 0.052    | 0.005   | 2.1             |
| Man 9   | 0.026    | 0.006   | 0.018    | 0.005   | 0.7             |
| Man9Glc | 0.075    | 0.014   | 0.093    | 0.008   | 1.2             |

**Table T-2** Data independent analysis (DIA) of IgG1 glycoforms in two control (Ctrl) and two cirrhosis (Cirr) plasma pools (5 samples per pool) based on the intensity of Y-ion fragments reported in Table 1.

|      | IgG1 | IgG2/3 | IgG4  |
|------|------|--------|-------|
| G0   | 4.82 | 11.11  | 13.64 |
| G0F  | 7.80 | 9.40   | 12.63 |
| G2F  | 6.61 | 2.81   | 3.15  |
| G2FS | 3.53 | 14.65  | 3.94  |

**Table T-3** Relative standard deviations (RSDs) of parallel measurement of soft fragment intensities under optimized collision energy

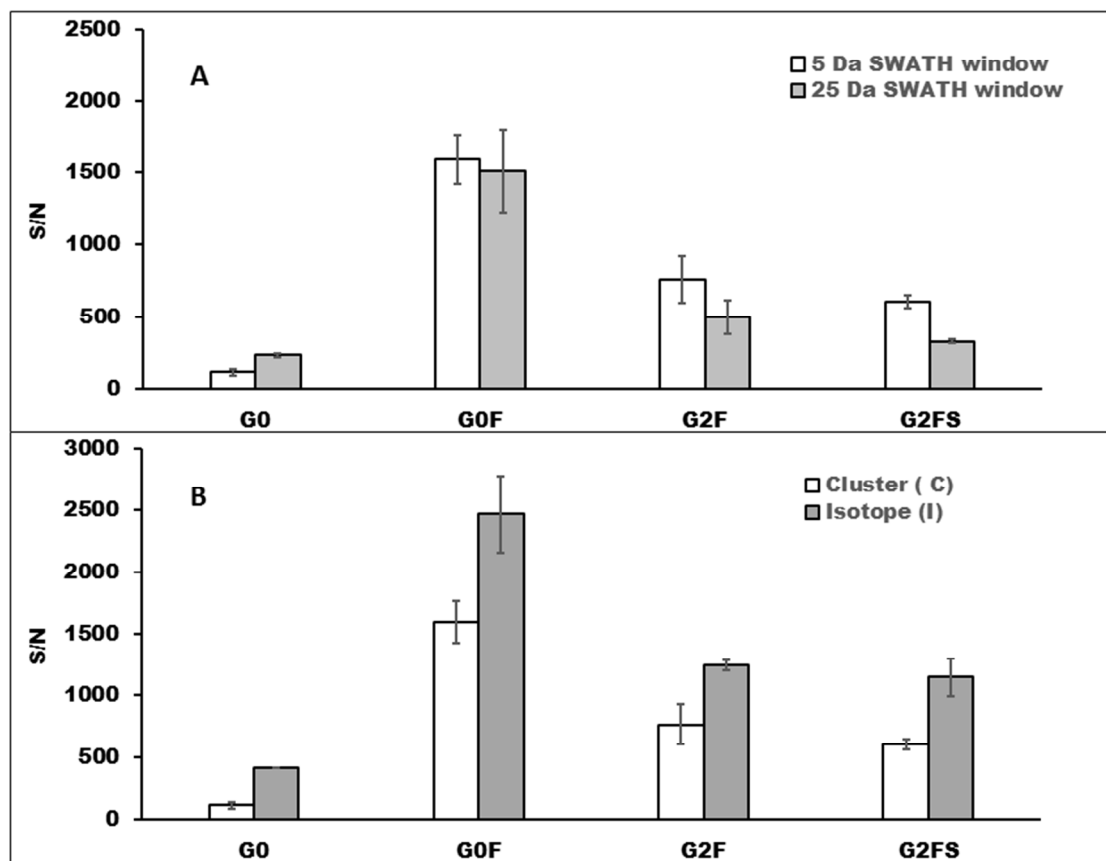

**Figure S-1.** Optimization of the signal to noise (S/N) on G0, G0F, G2F, and G2FS glycoforms of IgG1: **A.** comparison of acquisition using 5 Da and 25 Da isolation windows; **B.** comparison of 'soft' fragment XIC of entire isotope cluster with width of window 1.2Da (C) and sum of XICs of three major isotopes with window width 0.1 Da (I)

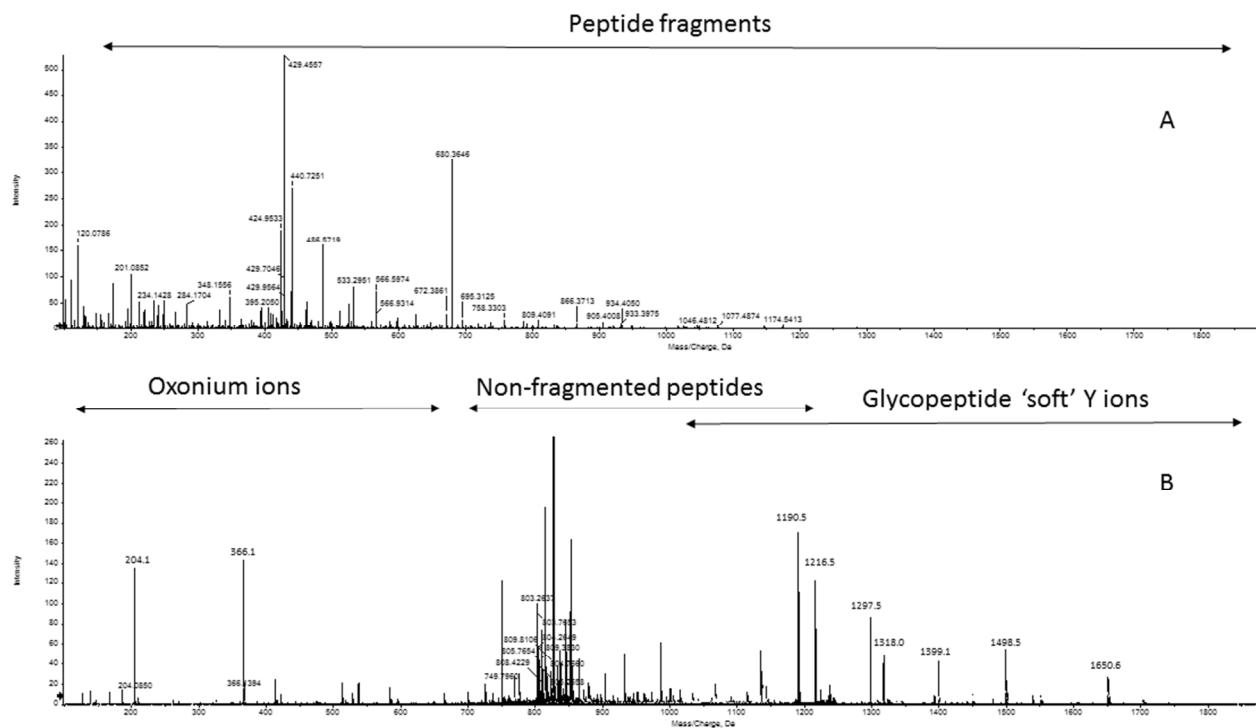

**Figure S-2.** Fragmentation spectra acquired under the following conditions: **A.** CE typical for peptide fragmentation; and **B.** CE optimized for 'soft' glycopeptide fragmentation; the signal represents overlaid fragmentation spectra in a 1 minute chromatographic elution time of the IgG1 glycopeptides.



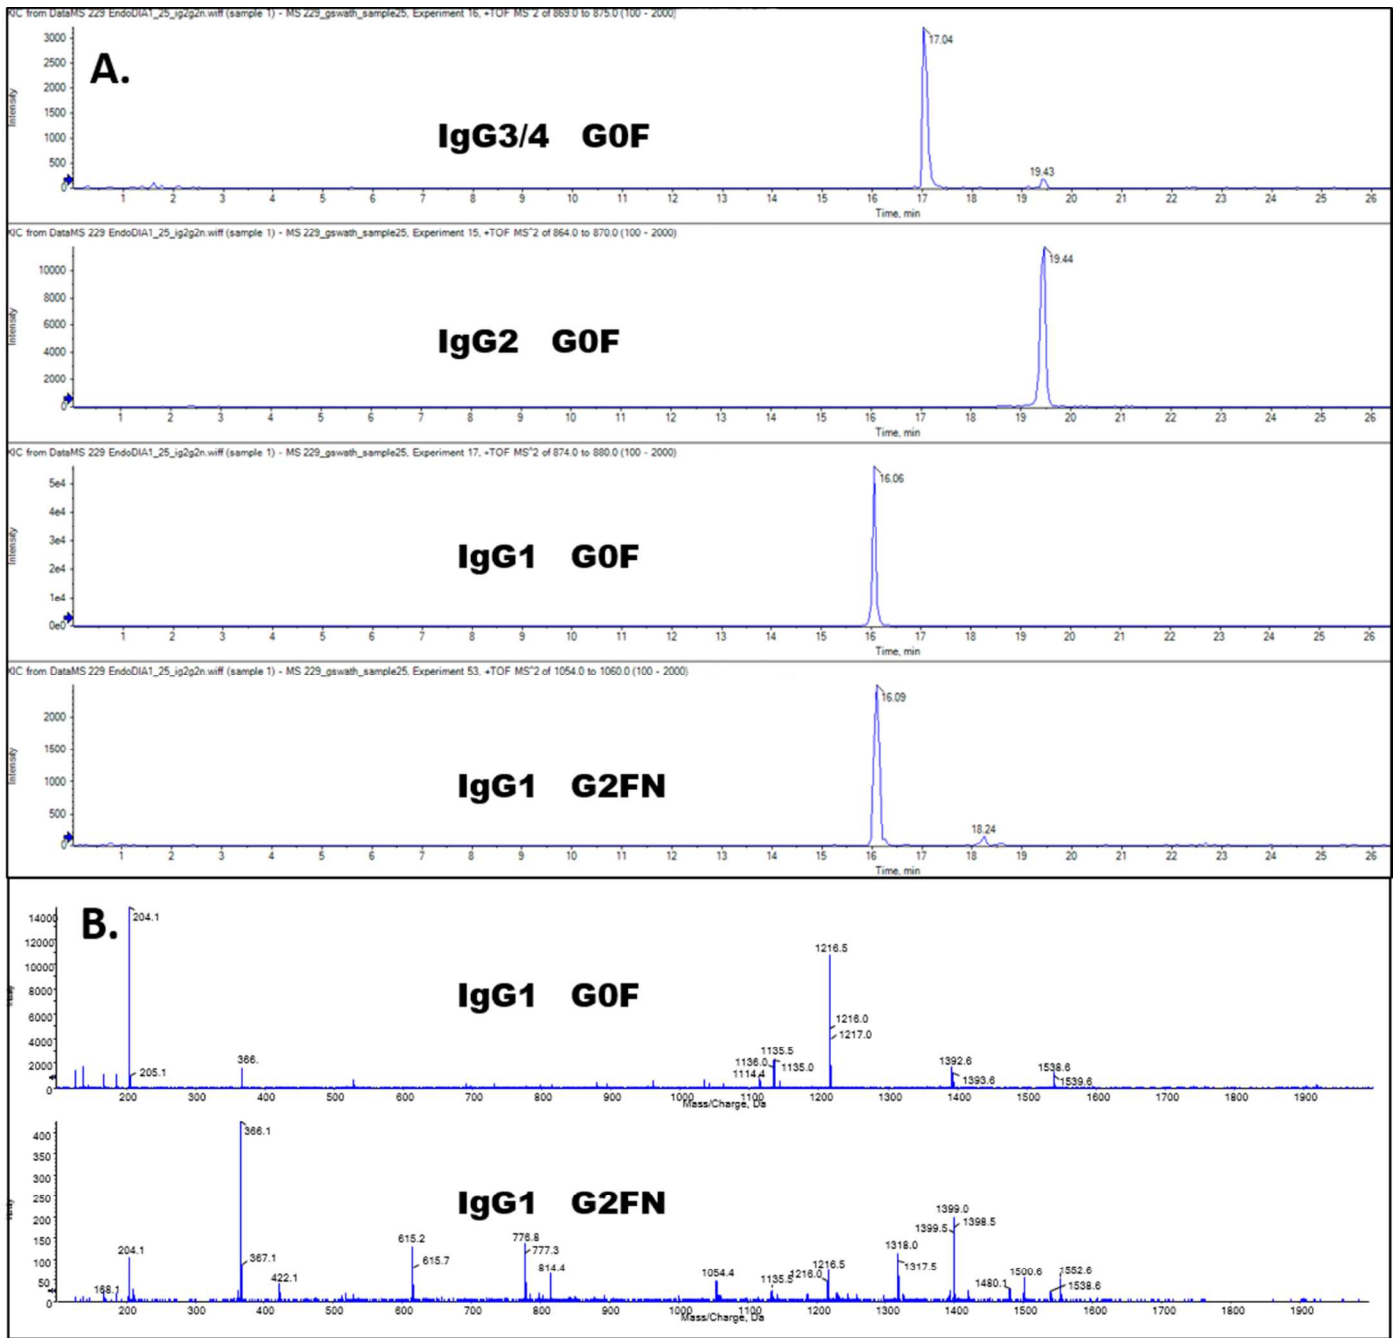

**Figure S-3.** Detection of the glycoforms of IgG by SWATH DIA of a tryptic digest of unfractionated human plasma: **A.** XIC of G0F, a major glycoforms of the IgG1, IgG2/3, and IgG4 subclasses, and G2NB, a minor glycoform of IgG1; **B.** Soft fragmentation spectra of the G0F and G2N glycoforms of IgG1 documenting the Y-ions used for XIC.

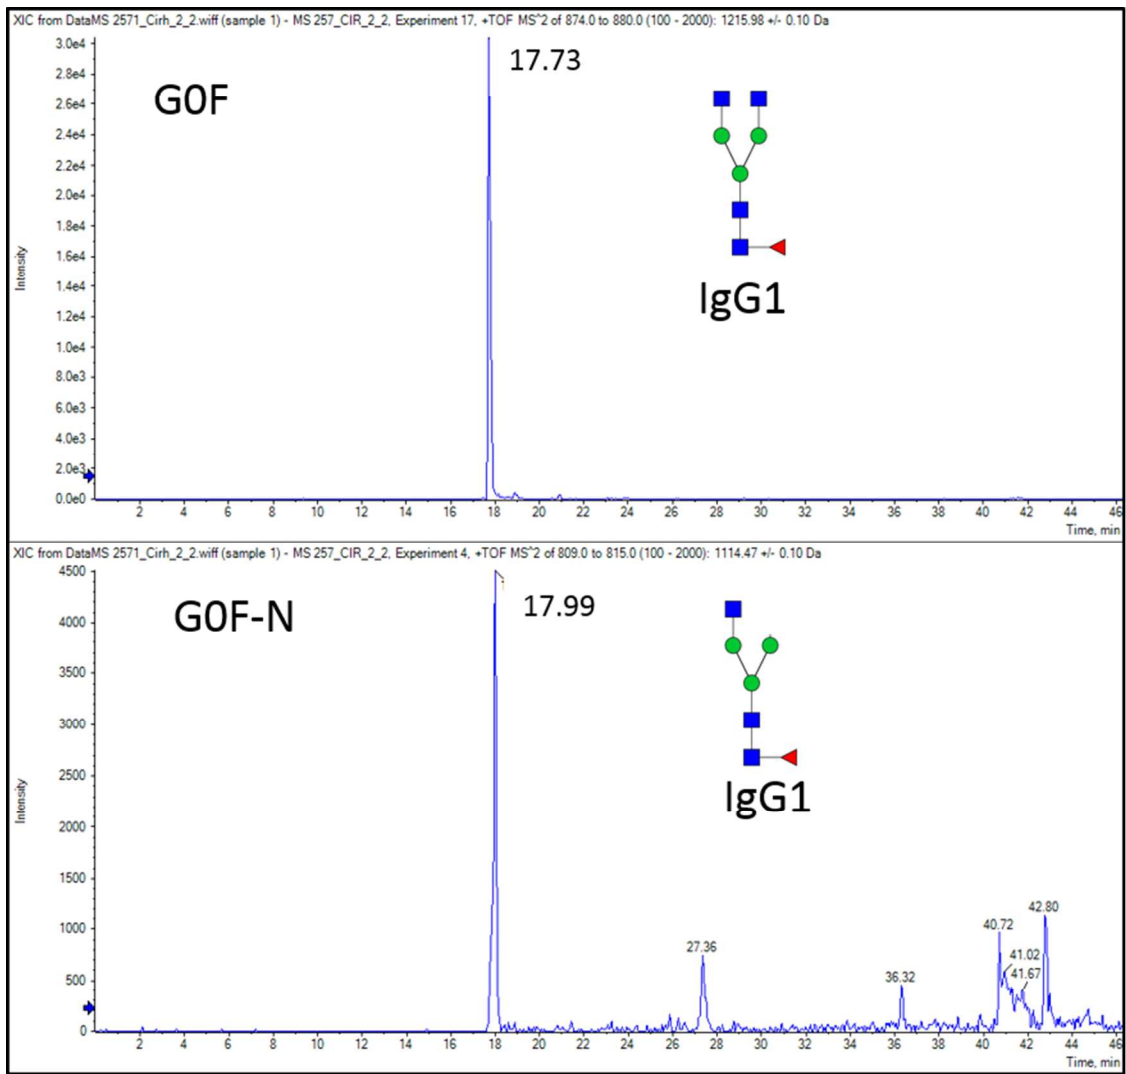

**Figure S-4.** XIC chromatograms of the GOF and GOF-N glycoforms of IgG1 detected at different retention times which excludes in source fragmentation as origin of the GOF-N glycoform.
